# Supplementary material for: Evaluation of the Number of Visits to Chinese Medical Institutions Using a Logistic Differential Equation Model
Source: Hindawi journal article supplement (doi:10.1155/2021/7943651), 2021-01-01
Supplement: f1 [file 7943651.f1.zip]

Archive with 9 entries (9 files):
- 7943651.f1/1. MatLab-codes of phase diagram.pdf
- 7943651.f1/2. MatLab-codes of the influence of m value change on the system.pdf
- 7943651.f1/3. MatLab-codes for the influence of k_1 value change on the system.pdf
- 7943651.f1/3. MatLab-codes of the influence of k_1 value change on the system.pdf
- 7943651.f1/4. MatLab-codes of the influence of k_2 value change on the sustem.pdf
- 7943651.f1/5. Matlab-codes of the influence of r_1 value change on the system.pdf
- 7943651.f1/6. Matlab-codes of the influence of  r_2 value change on the system.pdf
- 7943651.f1/7. MatLab-codes of the influence of d_1 value change on the system.pdf
- 7943651.f1/8. MatLab-codes of the influence of d_2 value change on the system.pdf
